# Supplementary material
Source: PubMed Central journal article supplement (PMC8545109)
Supplement: mbio.03274-20-sf001.pdf [file mbio.03274-20-sf001.pdf]

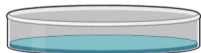

Culture control cells

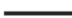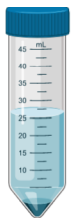

Isolate nuclei

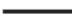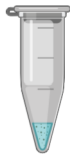

Acid extract histones

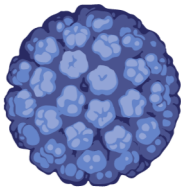

Purify virions

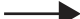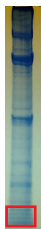

Gel extraction

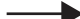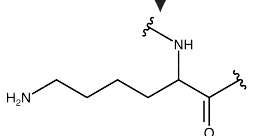

Propionylation of lysines

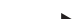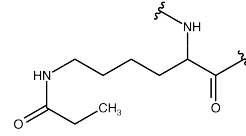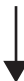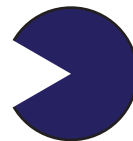

Trypsin digestion of arginines

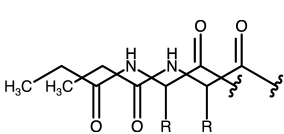

2nd propionylation

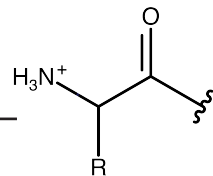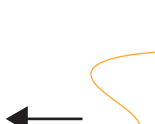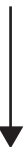

C18 LC column

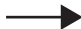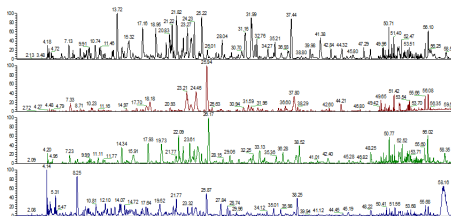

MS

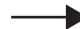

EpiProfile 2.3 analysis
