# Supplementary material
Source: PubMed Central journal article supplement (PMC8545109)
Supplement: mbio.03274-20-sf002.pdf [file mbio.03274-20-sf002.pdf]

**A**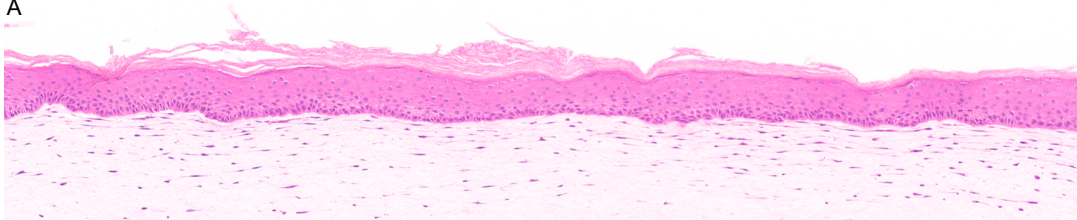

Stratum corneum  
Stratum granulosum  
Stratum spinosum  
Stratum basale

Collagen matrix  
with fibroblasts

**B**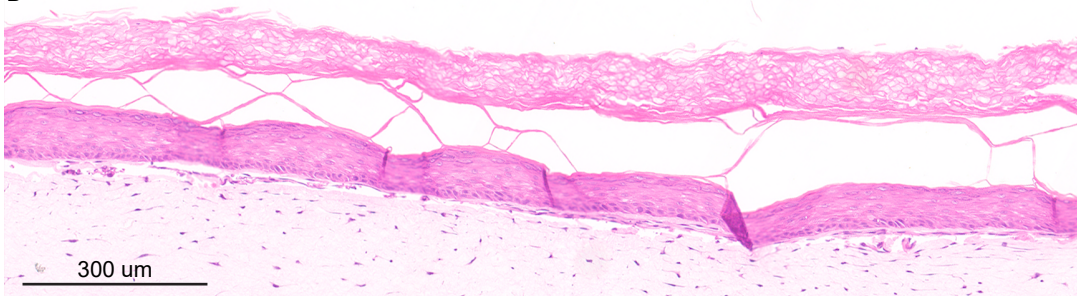

Stratum corneum

Stratum granulosum  
Stratum spinosum  
Stratum basale

Collagen matrix  
with fibroblasts

300 um
